# Supplementary material for: The effects of high-frequency rTMS over the left DLPFC on cognitive control in young healthy participants
Source: PubMed Central journal article supplement (PMC5470713; doi:10.1371/journal.pone.0179430), 2017-06-14
Supplement: pone.0179430.s002.pdf [file pone.0179430.s002.pdf]

**S2 Table. The mean N450 amplitudes of the Stroop task under two conditions at two time points in the rTMS and sham rTMS groups.**

| Group           | mean N450 amplitudes of the Stroop task(uv) |             |             |                          |
|-----------------|---------------------------------------------|-------------|-------------|--------------------------|
|                 | Congruent                                   |             | Incongruent |                          |
|                 | T1                                          | T2          | T1          | T2                       |
| rTMS group      | 9.61 ±4.804                                 | 9.24 ±5.367 | 6.59 ±5.754 | 2.64 ±5.798 <sup>f</sup> |
| Sham rTMS group | 9.74 ±5.614                                 | 9.23 ±5.568 | 6.96 ±6.313 | 6.86 ±6.980              |

T1, at baseline, before stimulation; T2, immediately after 7 days of rTMS or sham rTMS.

<sup>f</sup> rTMS vs. sham rTMS: p<0.05.
